# Supplementary material for: Jet stream variability in a polar warming scenario – a laboratory perspective
Source: Copernicus journal article supplement (doi:10.5194/egusphere-2022-148), 2022-04-07
Supplement: Supplementary file [file egusphere-2022-148-AC1-supplement.pdf]

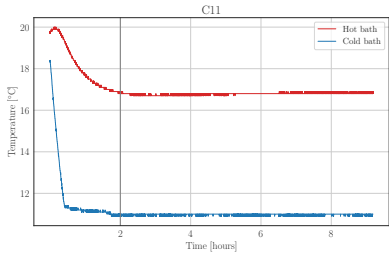

(a)

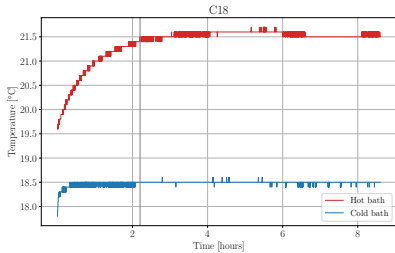

(b)
